# Supplementary material for: Drying Treatments Change the Composition of Aromatic Compounds from Fresh to Dried Centennial Seedless Grapes
Source: PubMed Central journal article supplement (PMC7998674; doi:10.3390/foods10030559), 2021-03-08
Supplement: foods-10-00559-s001.pdf [file foods-10-00559-s001.pdf]

File S1: List of chemicals.

## 2.2. Chemicals

The sodium hydroxide (NaOH), glucose, sodium chloride (NaCl), sodium dihydrogen phosphate, and citric acid were obtained from Beijing Chemical Works (China). The chemicals, dichloromethane, methanol, and ethanol that were used for the extraction of VOCs were purchased by Honeywell (Morris Township, NJ®). The distilled water was taken from a Milli-Q purification system (Millipore, Bedford, MA).

For the identification and quantification of free volatile compounds, the following standards were purchased from Sigma®-Aldrich (St. Louis, MO): 1-octanol (99.0%), 3-methyl-1-butanol (99.0%), 2-ethyl-1-hexanol (99.0%), 1-octen-3-ol (98.0%), 1-nonanol (99.0%), octanoic acid (99.0%), benzyl alcohol (98.0%), 2-methyl-propanoic acid (99.5%), heptanoic acid (99.0%), hexanoic acid (99.5%), hexanal (98.0%), (E)-2-hexenal (98.0%), nonanal (95.0%), octanal (99.0%), benzaldehyde (99.0%), ethyl acetate (99.8%), diethyl succinate (99.0%), benzene acetaldehyde (90.0%), ethyl phenylacetate (99.0%), ethyl nonanoate (98.0%), methyl salicylate (99.0%), acetoin (96.0%), 6-methyl-5-hepten-2-one (99.0%),  $\alpha$ -terpineol (90.0%),  $\alpha$ -cymene (98.0%), limonene (97.0%), neral (95.0%), hotrienol (97.0%), terpinolene (97.0%),  $\beta$ -damascenone (> 90.0%), linalool (97.0%),  $\beta$ -citronellol (95.0%), geranyl acetone (35% nerylacetone), geraniol (99.5%), geranic acid (85.0%), 2,3-diethylpyrazine (98.0%), 5-methyl-2-furfural (99.0%), 2-ethyl-6-methyl, 4-methyl-2-pentanol (98.0%, internal standard), 3-ethyl-2,5-dimethyl pyrazine (98.0%), pyrazine (99.5%), naphthalene (99.0%), phenol (99.9%) and furfural (99.5%).

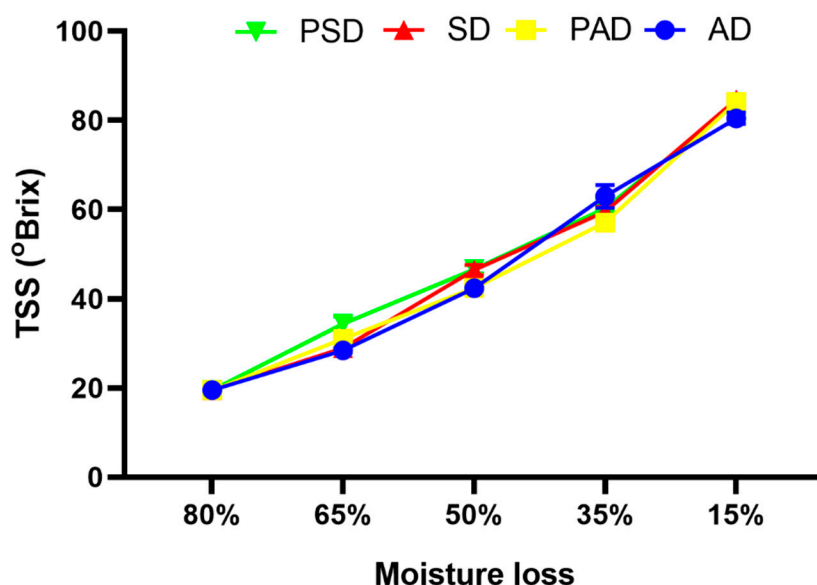

**Figure 1.** The effect of drying treatments on the changing of TSS during the drying of centennial Seedless raisins.

**Table 1.** The concentration of free- and glycosidically bound VOCs in fresh and dried centennial Seedless grapes.

| RI             | Compound Name                                        | Ion m/z | ID | Source                   | Fresh                                 | AD-Raisin        | PAD-Raisin      | SD-Raisin      | PSD-Raisin       | Free-form Volatile compounds |                |              |              |              |              |
|----------------|------------------------------------------------------|---------|----|--------------------------|---------------------------------------|------------------|-----------------|----------------|------------------|------------------------------|----------------|--------------|--------------|--------------|--------------|
|                |                                                      |         |    |                          |                                       |                  |                 |                |                  | Fresh                        | AD-Raisin      | PAD-Raisin   | SD-Raisin    | PSD-Raisin   |              |
| 1              | 975 Pentanal <sup>W,J</sup>                          | 44      | 2  | UFAO 12 <sup>3,7</sup>   | Fat, Green <sup>g</sup>               | 167.92 ± 13.06a  | 69.36 ± 2.34cd  | 64.23 ± 2.51d  | 86.8 ± 6.14bc    | 81.01 ± 7.64b                | 574.93 ± 6.1   | NF           | NF           | 102.67 ± 3.5 | 105.7 ± 2.38 |
| 2              | 1066 Hexanal <sup>B,W,J</sup>                        | 44      | 1  | UFAO 4,5 <sup>3,7</sup>  | Green <sup>g</sup>                    | 6972.72 ± 365.7a | 365.44 ± 24.86b | 285.95 ± 2.96b | 547.62 ± 13.12b  | 551.07 ± 5.42b               | 641.1 ± 6.64   | 25.21 ± 0.3  | 22.57 ± 1.62 | 103.51 ± 0.6 | 115.36 ± 3.1 |
| 3              | 1178 Heptanal <sup>B,W,J</sup>                       | 44      | 2  | UFAO 3 <sup>3,7</sup>    | Dry fish, solvent, smoky <sup>g</sup> | 86.1 ± 7.32a     | 34.22 ± 0.87bc  | 24.76 ± 1.43c  | 48.17 ± 3.71b    | 36.66 ± 0.74bc               | NF             | NF           | NF           | NF           | NF           |
| 4              | 1292 Octanal <sup>B,W</sup>                          | 43      | 2  | UFAO 0.7 <sup>3,7</sup>  | Honey, Green, Fatty <sup>g</sup>      | 386.85 ± 45.07a  | NF              | NF             | NF               | NF                           | 199.36 ± 27.37 | NF           | NF           | NF           | NF           |
| 5              | 1393 Nonanal <sup>B,W,J</sup>                        | 57      | 1  | UFAO 1 <sup>3,7</sup>    | Green, Fruity <sup>g</sup>            | 6.38 ± 0.08a     | 1.18 ± 0.23c    | 1.38 ± 0.07bc  | 1.74 ± 0.35b     | 1.49 ± 0.27bc                | 0.51 ± 0.06    | 0.86 ± 0.01  | 0.69 ± 0     | 0.06 ± 0     | 0.15 ± 0.01  |
| 6              | 1501 Decanal <sup>B,W,J</sup>                        | 43      | 1  | UFAO 0.1 <sup>3</sup>    | Sweet, citrus, green <sup>e</sup>     | NF               | NF              | 1.88 ± 0.03a   | 1.84 ± 0.07a     | 2.08 ± 0.44a                 | NF             | NF           | NF           | 0.47 ± 0.04  | 0.9 ± 0.08   |
| 7              | 1217 ( <i>E</i> )-2-Hexenal <sup>B,W,J</sup>         | 41      | 1  | UFAO 17 <sup>3,7</sup>   | Green <sup>g</sup>                    | 3304.21 ± 85.45a | 63.7 ± 3.77c    | 134.68 ± 9.12b | 17.77 ± 0.32c    | 44.97 ± 2.29c                | 152.77 ± 23.02 | 2.06 ± 0.32  | 3.79 ± 0.45  | NF           | NF           |
| 8              | 1325 ( <i>E</i> )-2-Heptenal <sup>B,W,J</sup>        | 41      | 2  | UFAO 13 <sup>3,7</sup>   | Fatty, soapy, tal-low <sup>g</sup>    | 27.41 ± 2.29c    | 111.29 ± 6.05a  | 18.41 ± 0.37c  | 57.83 ± 9.67b    | 24.88 ± 3.41c                | 380.58 ± 18.83 | NF           | NF           | 59.76 ± 0.92 | 61.63 ± 0.94 |
| 9              | 1434 ( <i>E</i> )-2-Octenal <sup>B,W,J</sup>         | 41      | 2  | UFAO 3 <sup>3</sup>      | Green, fatty, nut <sup>g</sup>        | 22.7 ± 0.75a     | 6.69 ± 1.41d    | 4.68 ± 0.16c   | 11.39 ± 1.92b    | 8.38 ± 0.92c                 | NF             | NF           | NF           | NF           | NF           |
| 10             | 1539 ( <i>E</i> )-2-Nonenal <sup>B,W</sup>           | 43      | 2  | UFAO                     |                                       | NF               | NF              | 2.5 ± 0.1b     | 7.44 ± 0.38a     | NF                           | NF             | 30.06 ± 0.75 | 33.12 ± 1.31 | NF           | 8.24 ± 0.72  |
| 11             | 1497 ( <i>E,E</i> )-2,4-Heptadienal <sup>B,W,J</sup> | 81      | 2  | UFAO 49 <sup>4</sup>     | Fatty, hay <sup>b</sup>               | NF               | NF              | NF             | 86.71 ± 4.17b    | 111.18 ± 7.03a               | NF             | NF           | NF           | 26.27 ± 0.84 | 42.16 ± 1.52 |
| 12             | 1705 ( <i>E,E</i> )-2,4-Nonadienal <sup>B,W,J</sup>  | 81      | 2  | UFAO 0.09 <sup>3</sup>   | Green                                 | 179.65 ± 3.2b    | 241.35 ± 13.59a | 95.46 ± 8c     | 106.78 ± 12.96c  | 94.33 ± 4.12c                | NF             | NF           | NF           | NF           | NF           |
| 13             | 1530 Benzaldehyde <sup>B,W,J</sup>                   | 77      | 1  | MR 350 <sup>3,7</sup>    | Sweet, fruity <sup>g</sup>            | 13.43 ± 0.13b    | 25.6 ± 1.57a    | 15.2 ± 0.64b   | 14 ± 1.75b       | 14.05 ± 1.46b                | 7.9 ± 1.16     | 0.72 ± 0.03  | 1.64 ± 0.14  | 5.82 ± 0.11  | 2.48 ± 0.1   |
| 14             | 1650 Phenylacetaldehyde <sup>B,W,J</sup>             | 91      | 1  | MR 4 <sup>3,7</sup>      | Flowery, Rose <sup>g</sup>            | 386.96 ± 11.48a  | 326.67 ± 21.3b  | 163.4 ± 23.81c | 141.21 ± 11.87d  | 101.89 ± 9.17e               | 8.22 ± 1.76    | 6.05 ± 0.36  | 7.32 ± 0.25  | 2.11 ± 0.22  | 4.87 ± 0.37  |
| <b>Alcohol</b> |                                                      |         |    |                          |                                       |                  |                 |                |                  |                              |                |              |              |              |              |
| 15             | 1205 1-Pentanol <sup>W,J</sup>                       | 52      | 2  | UFAO 4000 <sup>3</sup>   | Balsamic, almond <sup>c</sup>         | 14.81 ± 0.74a    | 8.54 ± 0.77c    | 8.69 ± 0.28c   | 11.92 ± 0.66b    | 12.99 ± 0.43b                | 16.85 ± 2.23   | 2.45 ± 0.09  | 6.73 ± 1.11  | 4.45 ± 0.12  | 8.51 ± 0.28  |
| 16             | 1349 1-Hexanol <sup>W,J</sup>                        | 56      | 2  | UFAO 2500 <sup>3</sup>   | green <sup>b</sup>                    | 901.25 ± 76.68a  | 74.36 ± 4.56c   | 156.45 ± 7.01b | 110.57 ± 11.26bc | 128.71 ± 2.79bc              | 59.48 ± 0.34   | 17.33 ± 1.1  | 73.78 ± 3.68 | 34.19 ± 0.42 | 79.9 ± 2.56  |
| 17             | 1453 1-Heptanol <sup>W,J</sup>                       | 70      | 2  | UFAO 1000 <sup>3,5</sup> | Grape, sweet <sup>c</sup>             | 9.65 ± 0.22a     | NF              | 2.21 ± 0.01c   | 7.13 ± 0.95b     | 7.58 ± 0.83b                 | 19.73 ± 0.89   | 1.13 ± 0.02  | 3.68 ± 0.07  | 3.84 ± 0.01  | 4.24 ± 0.06  |
| 18             | 1555 1-Octanol <sup>B,W,J</sup>                      | 56      | 1  | UFAO 130 <sup>2,3</sup>  | Citrus, rose <sup>c</sup>             | 6.71 ± 0.22a     | 2.64 ± 0.19c    | 1.37 ± 0.05d   | 2.63 ± 0.46c     | 5.55 ± 0.26b                 | 2.45 ± 0.42    | 0.78 ± 0.04  | 1.84 ± 0.15  | 0.74 ± 0.02  | 1.55 ± 0.23  |
| 19             | 1657 1-Nonanol <sup>W,J</sup>                        | 56      | 1  | UFAO 50 <sup>3</sup>     | Floral <sup>b</sup>                   | 1.93 ± 0.06a     | 0.58 ± 0.01bc   | 0.32 ± 0.01d   | 0.51 ± 0.06c     | 0.7 ± 0.12b                  | 0.36 ± 0.01    | 0.29 ± 0.01  | 0.39 ± 0.02  | 0.11 ± 0.01  | 0.11 ± 0     |
| 20             | 1411 2-Octanol <sup>B,W,J</sup>                      | 45      | 2  | UFAO NF                  | NF                                    | 0.83 ± 0.06a     | NF              | NF             | NF               | NF                           | 1.39 ± 0.17    | 0.04 ± 0     | 0.26 ± 0.02  | 0.29 ± 0.01  | 0.33 ± 0.02  |

|              |      |                                       |    |   |      |                     |                                    |                   |                  |                  |                  |                  |                 |                |                |               |                |
|--------------|------|---------------------------------------|----|---|------|---------------------|------------------------------------|-------------------|------------------|------------------|------------------|------------------|-----------------|----------------|----------------|---------------|----------------|
| 21           | 1488 | 2-Nonanol <sup>J</sup>                | 45 | 2 | UFAO | 58 <sup>4</sup>     | Fruity, green <sup>d, f</sup>      | 1.86 ± 0.07a      | NF               | NF               | NF               | NF               | NF              | NF             | NF             | NF            | NF             |
| 22           | 1449 | 1-Octen-3-ol <sup>B, W, J</sup>       | 57 | 1 | UFAO | 3 <sup>3,7</sup>    | Mushroom, fruity <sup>b, g</sup>   | 14.93 ± 0.62d     | 23.18 ± 3.3c     | 24.99 ± 0.8c     | 36.48 ± 5.83b    | 52.42 ± 2.3a     | 2.33 ± 0.06     | 0.22 ± 0.02    | 0.71 ± 0.06    | 0.98 ± 0.01   | 1.46 ± 0.13    |
| 23           | 1614 | (E)-2-Octen-1-ol <sup>W, J</sup>      | 57 | 2 | UFAO | 18-5                | Fatty, rancid <sup>b</sup>         | 3.15 ± 0.07d      | 10.86 ± 0.09a    | 5.65 ± 0.34c     | 2.5 ± 0.57e      | 7.42 ± 0.34b     | 3.17 ± 0.23     | 0.1 ± 0.01     | 0.31 ± 0.01    | 0.87 ± 0.03   | 0.93 ± 0.05    |
| 24           | 1487 | 2-Ethyl-1-hexanol <sup>W, J</sup>     | 57 | 1 | UFAO | 2700 <sup>3</sup>   | Floral, sweet fruity <sup>c</sup>  | 15.26 ± 0.41a     | 0.78 ± 0.08c     | 3.31 ± 0.01b     | 1.03 ± 0.51c     | 3.24 ± 0.15b     | 6.45 ± 0.22     | 1.15 ± 0.12    | 1.78 ± 0.3     | 4.57 ± 0.05   | 5.13 ± 0.77    |
| 25           | 1395 | (Z)-3-Hexen-1-ol <sup>J</sup>         | 67 | 2 | UFAO | 100 <sup>3,5</sup>  | Fruity, green <sup>b</sup>         | 387.23 ± 28.45a   | 52.3 ± 0.71b     | 38.83 ± 0.74b    | NF               | 32.11 ± 0.19b    | 69.32 ± 8.72    | 11.61 ± 0.59   | 14.74 ± 1.14   | 8.59 ± 0.29   | 11.54 ± 1.86   |
| 26           | 1203 | 3-Methyl-1-butanol <sup>W, J</sup>    | 55 | 1 | UFAO | 300 <sup>3</sup>    | Malt, whiskey <sup>a</sup>         | NF                | 1814.98 ± 32.3a  | 1455.15 ± 26.93b | 1130.05 ± 32.01c | 1487.78 ± 24.13b | 2719.5 ± 278.12 | 458.24 ± 30.31 | 797.17 ± 60.47 | 326.35 ± 3.34 | 543.99 ± 27.7  |
| 27           | 1458 | Sulcatol <sup>J</sup>                 | 95 | 2 | CR   | 2000 <sup>3</sup>   | Fruity, sweet <sup>g</sup>         | 9.84 ± 0.14a      | 2.73 ± 0.04b     | 1.68 ± 0.03c     | 0.74 ± 0.23d     | 1.44 ± 0.16c     | 2.41 ± 0.26     | 0.55 ± 0.04    | 1.64 ± 0.24    | 0.47 ± 0.02   | 1.84 ± 0.09    |
| 28           | 942  | Ethyl alcohol <sup>J</sup>            | 31 | 2 |      | 1000 <sup>3</sup>   | Sweet <sup>a</sup>                 | 13143.64 ± 1679ab | 13526.01 ± 531a  | 7751.14 ± 85.13c | 8197.47 ± 165c   | 11920.23 ± 732d  | 228.96 ± 6.79   | NF             | NF             | 81.83 ± 1.42  | 25.35 ± 4.07   |
| 29           | 1317 | 3-Methyl-2-buten-1-ol <sup>W, J</sup> | 71 | 2 |      | NF                  | Fruity                             | NF                | NF               | NF               | NF               | NF               | 2.28 ± 0.12     | 0.65 ± 0.03    | 0.87 ± 0.12    | 0.41 ± 0.01   | 1.04 ± 0.04    |
| 30           | 1879 | Benzyl alcohol <sup>W, J</sup>        | 79 | 1 |      | 1000 <sup>3,7</sup> | Fruity, sweet <sup>g</sup>         | 279.02 ± 18.52a   | 283.38 ± 16.54a  | 109.02 ± 3.61b   | 23.96 ± 0.05c    | 120.75 ± 5.05b   | 348.41 ± 11.83  | 22.8 ± 0.77    | 327.56 ± 17.44 | 103.82 ± 4.8  | 619.68 ± 19.48 |
| 31           | 1914 | Phenylethyl alcohol <sup>W, J</sup>   | 91 | 2 |      | 1100 <sup>3</sup>   | Floral, Rose, Honey <sup>g</sup>   | 363.21 ± 32.76a   | 358.05 ± 37.8a   | 92.78 ± 2.82c    | 43.41 ± 6.67d    | 155.29 ± 13.89b  | 426.82 ± 17.4   | 10.54 ± 1.39   | 66.62 ± 3.77   | 71.56 ± 0.43  | 97.49 ± 1.15   |
| 32           | 1148 | 1-Butanol <sup>J</sup>                | 56 | 2 |      | 500 <sup>3</sup>    | Fruity, floral <sup>b</sup>        | 248.09 ± 35.63a   | 47.43 ± 1.51b    | 44.66 ± 0.93b    | 37.55 ± 4.11b    | 32.58 ± 2.4b     | NF              | 40.81 ± 0.03   | 34.19 ± 1.86   | 11.81 ± 0.11  | 29.64 ± 0.67   |
| <b>Ester</b> |      |                                       |    |   |      |                     |                                    |                   |                  |                  |                  |                  |                 |                |                |               |                |
| 33           | 1227 | Ethyl hexanoate <sup>W, J</sup>       | 88 | 1 | UFAO | 1 <sup>3,7</sup>    | Fruity, apple like <sup>a, g</sup> | 10.63 ± 2.55b     | 14.38 ± 4.31a    | 11.67 ± 0.21b    | 6.32 ± 2.87      | 3.82 ± 1.48d     | NF              | NF             | NF             | NF            | NF             |
| 34           | 1570 | Ethyl octanoate <sup>W, J</sup>       | 88 | 1 | UFAO | 377 <sup>3</sup>    | Fruity, floral <sup>b</sup>        | 5.56 ± 0.45a      | 2.43 ± 0.21b     | 1.13 ± 0.03d     | 1.17 ± 0.07d     | 1.72 ± 0.13c     | NF              | 0.92 ± 0.04    | 0.73 ± 0.01    | NF            | NF             |
| 35           | 1378 | Methyl octanoate <sup>J</sup>         | 74 | 2 | UFAO | 200 <sup>3</sup>    | Fruity, citrus like <sup>a</sup>   | NF                | NF               | 0.14 ± 0b        | 0.14 ± 0.01b     | 0.17 ± 0.02a     | NF              | NF             | NF             | NF            | NF             |
| 36           | 1570 | Ethyl nonanoate <sup>J</sup>          | 88 | 1 | UFAO | 377 <sup>3</sup>    | Fruity, floral <sup>b</sup>        | NF                | NF               | 0.16 ± 0a        | NF               | NF               | NF              | NF             | NF             | NF            | NF             |
| 37           | 1227 | Ethyl hexadecanoate <sup>W, J</sup>   | 88 | 1 | UFAO | 1 <sup>3,7</sup>    | Fruity, apple like <sup>a, g</sup> | 47.55 ± 5.31a     | 11.39 ± 0.54b    | 7.71 ± 0.28b     | 8.13 ± 0.09b     | 8.29 ± 0.09b     | NF              | NF             | NF             | NF            | NF             |
| 38           | 2163 | Methyl hexadecanoate <sup>J</sup>     | 74 | 2 | UFAO | NF                  | NF                                 | 0.44 ± 0.06a      | 0.14 ± 0.01b     | 0.07 ± 0c        | NF               | NF               | 2.36 ± 0.05     | NF             | NF             | NF            | NF             |
| 39           | 1636 | Butyrolactone <sup>W, J</sup>         | 42 | 2 | UFAO | NF                  | NF                                 | 3.75 ± 0.5d       | 8.68 ± 0.12a     | 6.58 ± 0.52b     | 5.57 ± 0.4c      | 8.19 ± 0.74a     | NF              | NF             | NF             | NF            | NF             |
| 40           | 2035 | γ-Nonalactone <sup>W, J</sup>         | 85 | 2 | UFAO | 30-6                | Coconut, peach <sup>a</sup>        | 3.34 ± 0.29b      | 8.99 ± 0.68a     | 1.49 ± 0.04c     | 1.43 ± 0.12c     | 1.81 ± 0.57c     | 0.84 ± 0.11     | 0.6 ± 0.02     | 0.8 ± 0.07     | 0.17 ± 0      | 0.26 ± 0.01    |
| 41           | 885  | Ethyl acetate <sup>W, J</sup>         | 43 | 1 |      | 5000 <sup>3,7</sup> | Fruity, solvent <sup>g</sup>       | 322.94 ± 20.33d   | 1509.48 ± 34.63a | 1400.73 ± 63.66b | 368.82 ± 16.62d  | 801.43 ± 22.32c  | 113.29 ± 2.4    | 9.26 ± 0.36    | 11.58 ± 8.66   | 20.61 ± 0.26  | 25.77 ± 3.7    |
| 42           | 1639 | Ethyl decanoate <sup>W</sup>          | 88 | 1 |      | 200-4               | Fruity, apple <sup>b</sup>         | NF                | NF               | NF               | NF               | NF               | NF              | 8.79 ± 0.04    | 12.17 ± 8.39   | NF            | NF             |

|                        |      |                                         |     |   |      |                         |                                        |                         |                        |                        |                         |                        |                    |                       |                       |                     |                     |
|------------------------|------|-----------------------------------------|-----|---|------|-------------------------|----------------------------------------|-------------------------|------------------------|------------------------|-------------------------|------------------------|--------------------|-----------------------|-----------------------|---------------------|---------------------|
| 43                     | 1677 | Diethyl succinate <sup>W,J</sup>        | 101 | 1 |      | 5000<br>00 <sup>3</sup> | Fruity, wine <sup>a,f</sup>            | NF                      | NF                     | 1.57 ± 0.04a           | NF                      | 1.46 ± 0.06b           | NF                 | NF                    | NF                    | NF                  | NF                  |
| 44                     | 1782 | Methyl salicylate <sup>JF</sup>         | 120 | 1 |      | 40 <sup>3</sup>         | Green Pine <sup>a,g</sup>              | NF                      | NF                     | 2.98 ± 0.09a           | NF                      | NF                     | 3.62 ± 0.42        | 3.81 ± 0.13           | 2.95 ± 0.29           | 0.65 ± 0.01         | 0.7 ± 0             |
| 45                     | 1253 | Ethyl salicylate <sup>J</sup>           |     | 2 |      | NF                      | Green, mint <sup>a</sup>               | NF                      | NF                     | 0.54 ± 0.01a           | 0.36 ± 0.01b            | NF                     | NF                 | NF                    | NF                    | NF                  | 0.58 ± 0.02         |
| 46                     | 942  | Ethyl alcohol <sup>J</sup>              | 31  | 2 |      | 1000<br>00 <sup>3</sup> | Sweet <sup>a</sup>                     | 13143.64 ±<br>1679.41ab | 13526.01 ±<br>531.25a  | 7751.14 ±<br>85.13c    | 8197.47 ±<br>165.51c    | 11920.23 ±<br>732.92b  | NF                 | NF                    | NF                    | NF                  | NF                  |
| 47                     | 1470 | β-Ionone <sup>J</sup>                   | 177 | 2 | CR   | 0.007<br>3,7            | Balsamic, rose <sup>g</sup>            | 5.41 ± 0.21a            | 1.07 ± 0.05b           | 0.75 ± 0.02c           | NF                      | NF                     | 24.28 ± 0.94       | 0.84 ± 0.08           | 1.74 ± 0.03           | 3.74 ± 0.06         | 3.81 ± 0.04         |
| <b><i>Acid</i></b>     |      |                                         |     |   |      |                         |                                        |                         |                        |                        |                         |                        |                    |                       |                       |                     |                     |
| 48                     | 1740 | Pentanoic acid <sup>W,J</sup>           | 60  | 2 | UFAO | 3000<br>3               | Sweet                                  | NF                      | NF                     | 74.41 ± 2.76b          | 187.82 ± 8.88a          | NF                     | 334.16 ± 19.81     | NF                    | NF                    | 64.84 ± 0.62        | 71.05 ± 0.65        |
| 49                     | 1847 | Hexanoic acid <sup>B,W,J</sup>          | 60  | 1 | UFAO | 3000<br>3,7             | Raincid, Cheesy,<br>Fatty <sup>g</sup> | 375.48 ± 19.8a          | 153.07 ± 13.89b        | 161.91 ±<br>26.48b     | 214.5 ± 11.34b          | 161.37 ± 56.99b        | NF                 | NF                    | NF                    | NF                  | NF                  |
| 50                     | 1953 | Heptanoic acid <sup>B,W,J</sup>         | 60  | 1 | UFAO | 3000<br>3               | Sweet, cheesy <sup>f</sup>             | 3.19 ± 0.57a            | 2.58 ± 0.17ab          | 2.17 ± 0.11b           | 2.52 ± 0.35ab           | 2.96 ± 0.66a           | 309.89 ± 7.8       | NF                    | 48.86 ± 0.79          | 49.38 ± 0.49        | 52.39 ± 2.11        |
| 51                     | 2060 | Octanoic acid <sup>B,W,J</sup>          | 60  | 1 | UFAO | 3000<br>3,7             | Raincid, Cheesy,<br>Fatty <sup>g</sup> | 2.41 ± 0.16b            | 4.63 ± 0.19a           | 2.33 ± 0.22b           | 2.29 ± 0.12b            | 2.11 ± 0.72b           | 315.84 ± 12.26     | NF                    | 49.66 ± 0.25          | 49.72 ± 0.58        | 52.51 ± 2.02        |
| 52                     | 2166 | Nonanoic acid <sup>B,W,J</sup>          | 60  | 2 |      | 3000<br>3               | Green, fat <sup>a,f</sup>              | 20.16 ± 1.9a            | 4.45 ± 0.17c           | 8.69 ± 1.26b           | 3.53 ± 0.03c            | 4.76 ± 0.24c           | 577.3 ± 22.3       | NF                    | 88.35 ± 4.22          | 90.96 ± 0.77        | 91.17 ± 1.08        |
| 53                     | 2484 | Dodecanoic acid <sup>W,J</sup>          | 73  | 2 | UFAO | 1000<br>0 <sup>3</sup>  | Dry, metallic <sup>f</sup>             | NF                      | NF                     | 10.9 ± 2.72a           | NF                      | NF                     | NF                 | NF                    | NF                    | NF                  | NF                  |
| 54                     | 1950 | 2-Ethylhexanoic acid <sup>W,J</sup>     | 88  | 1 |      | NF                      | NF                                     | NF                      | NF                     | 28.97 ± 0.51a          | NF                      | NF                     | NF                 | NF                    | NF                    | NF                  | NF                  |
| 55                     | 1433 | Acetic acid <sup>J</sup>                |     | 2 |      | 6000<br>0 <sup>5</sup>  | Vinegar <sup>d</sup>                   | 135518.4 ±<br>11152.8d  | 265800.8 ±<br>12361.5a | 180758.57 ±<br>7545.9c | 209013.96 ±<br>17456.5b | 114244.24 ±<br>6693.1e | 3371.18 ±<br>53.85 | 27031.11 ±<br>1012.09 | 22028.15 ±<br>1192.06 | 5804.92 ±<br>139.71 | 2457.09 ±<br>181.71 |
| <b><i>Terpenes</i></b> |      |                                         |     |   |      |                         |                                        |                         |                        |                        |                         |                        |                    |                       |                       |                     |                     |
| 56                     | 1011 | α-Terpinene <sup>N</sup>                | 121 | 2 |      | -                       |                                        | 377.96 ± 11.76a         | 36.38 ± 3.67b          | 18.52 ± 0.64c          | NF                      | 19.33 ± 2.3c           | 45.26 ± 1.15       | 14.31 ± 0.7           | 14.1 ± 2.97           | 6.57 ± 0.03         | 8.15 ± 0.37         |
| 57                     | 1286 | Terpinolene <sup>J</sup>                | 93  | 1 |      | 200 <sup>3</sup>        | Piney <sup>g</sup>                     | 185.51 ± 8.78a          | 17.59 ± 0.51b          | 14.86 ± 0.16bc         | 9.47 ± 0.09c            | NF                     | 34 ± 4.32          | 10.66 ± 0.3           | 8.76 ± 1.56           | 6.33 ± 0.08         | 7.28 ± 0.04         |
| 58                     | 1473 | Nerol oxide <sup>W,J</sup>              | 68  | 2 |      | 3000<br>7               | Oil, flowery <sup>g</sup>              | 141.28 ± 6.83b          | 226.12 ± 6.18a         | 65.67 ± 0.56d          | 22.77 ± 4.76e           | 99.44 ± 6.57c          | 47.94 ± 1.52       | 20.94 ± 2.1           | 29.27 ± 1.6           | 12.81 ± 0.53        | 34.76 ± 1.44        |
| 59                     | 1548 | Linalool <sup>W,J</sup>                 | 71  | 1 |      | 6 <sup>3,6</sup>        | Fruity, sweet,<br>grape <sup>b,e</sup> | 247.23 ± 32.98a         | 15.44 ± 0.71b          | 13.63 ± 0.49b          | 4.81 ± 0.39b            | 4.9 ± 0.69b            | 14.15 ± 0.02       | 1.58 ± 0.2            | 6.42 ± 0.7            | 2.3 ± 0.15          | 4.84 ± 0.3          |
| 60                     | 1610 | Hotrienol <sup>W,J</sup>                | 71  | 1 |      | 110 <sup>7</sup>        | Fresh, floral,<br>fruity <sup>g</sup>  | 99.66 ± 2.9a            | 31.05 ± 0.44b          | 25 ± 0.43c             | 14.51 ± 0.82d           | 10.67 ± 0.16e          | 2.88 ± 0.04        | 0.15 ± 0.2            | 0.58 ± 0.01           | 0.46 ± 0            | 0.61 ± 0.05         |
| 61                     | 1620 | p-Menth-1-en-9-al <sup>W,J</sup>        | 94  | 2 |      | NF                      | NF                                     | 40.38 ± 0.5a            | 11.18 ± 0.09b          | 6.55 ± 0.12c           | 6.36 ± 0.32cd           | 5.77 ± 0.43c           | 27.42 ± 1.03       | 4.98 ± 0.01           | 4.68 ± 0.06           | 4.35 ± 0.06         | 4.68 ± 0.01         |
| 62                     | 1698 | α-terpineol <sup>B,W,J</sup>            | 59  | 1 |      | 350 <sup>3</sup>        | Floral, sweet <sup>g</sup>             | 77.53 ± 2.74a           | 12.66 ± 0.6b           | 9.63 ± 0.13c           | 6.36 ± 0.15d            | 7.29 ± 0.45d           | 30.37 ± 0.32       | 6.92 ± 0.46           | 12.76 ± 0.73          | 5.48 ± 0.13         | 7.82 ± 0.07         |
| 63                     | 1739 | cis-Pyran linalool oxide <sup>W,J</sup> |     | 2 |      | NF                      | Floral, fruity,<br>Citrus <sup>a</sup> | 8.69 ± 0.31a            | 6.28 ± 0.08b           | 2.86 ± 0.08c           | 2.69 ± 0.07c            | 2.45 ± 0.23c           | 5.74 ± 0.26        | 1.3 ± 0.06            | 2.25 ± 0.04           | 2.59 ± 0.02         | 5.83 ± 0.27         |

|                       |      |                                                |     |   |      |                    |                                    |                 |                 |               |                |                |                |             |              |               |               |
|-----------------------|------|------------------------------------------------|-----|---|------|--------------------|------------------------------------|-----------------|-----------------|---------------|----------------|----------------|----------------|-------------|--------------|---------------|---------------|
| 64                    | 1764 | $\beta$ -Citronellol <sub>J</sub>              | 69  | 1 |      | 62 <sup>5</sup>    | Sweet, citrus like <sub>f</sub>    | 7.62 ± 0.28a    | 2.84 ± 0.15b    | 1.79 ± 0.45c  | NF             | NF             | 3.77 ± 0.3     | 0.4 ± 0.03  | 0.94 ± 0.02  | 0.76 ± 0      | 1.81 ± 0.09   |
| 65                    | 1799 | Nerol <sub>W,J</sub>                           | 69  | 2 |      | 300 <sub>3,7</sub> | Flower, grass, floral <sub>g</sub> | 276.43 ± 3.01a  | 74.14 ± 3.33b   | 26.37 ± 0.15d | 3.22 ± 0.18e   | 30.93 ± 2.77c  | 25.52 ± 1.77   | 11.59 ± 1.1 | 26.55 ± 1.36 | 3.63 ± 0.14   | 12.53 ± 0.82  |
| 66                    | 1825 | $\beta$ -damascenone <sub>W,J</sub>            | 69  | 1 |      | 0.09 <sup>6</sup>  | Sweet, floral, fruity <sub>g</sub> | 62.93 ± 7.23a   | 3.26 ± 0.13b    | 3.21 ± 0.1b   | 2.21 ± 0.07b   | 2.26 ± 0.4b    | 372.36 ± 6.9   | 14.72 ± 1.6 | 1.21 ± 0.12  | 62.88 ± 0.66  | 276.17 ± 9.99 |
| 67                    | 1847 | Geraniol <sub>W,J</sub>                        | 69  | 1 |      | 40 <sub>3,7</sub>  | Floral, rose, citrus <sub>g</sub>  | 235.23 ± 2.38a  | 71.45 ± 6.14b   | 21.77 ± 0.09c | 1.54 ± 0.15d   | 25.63 ± 2.38c  | 12.78 ± 1.55   | 7.64 ± 1.19 | 20.8 ± 2.39  | 2.32 ± 0.41   | 12.18 ± 0.96  |
| 68                    | 2049 | Nerolidol 2 <sub>J</sub>                       | 41  | 2 |      | NF                 | NF                                 | NF              | NF              | 0.58 ± 0a     | NF             | NF             | NF             | NF          | NF           | NF            | NF            |
| 69                    | 2340 | Geranic acid <sub>W,J</sub>                    | 69  | 1 |      | 40 <sup>7</sup>    | Green <sub>g</sub>                 | 489.07 ± 56.92a | 149.32 ± 5.42b  | 86.18 ± 6.87c | 16.74 ± 0.4d   | 25.57 ± 1.4d   | 956.52 ± 34.25 | 7.46 ± 0.36 | 44.8 ± 1.05  | 147.34 ± 1.76 | 162.6 ± 1.48  |
| 70                    | 1857 | Geranylacetone <sub>B,W,J</sub>                | 43  | 1 | CR   | 60 <sup>3</sup>    | Rose, floral <sub>b,f</sub>        | 6.1 ± 0.74a     | 1.4 ± 0.52b     | 0.8 ± 0.07b   | 0.77 ± 0.07b   | 1.18 ± 0.1b    | 17.71 ± 0.62   | 0.64 ± 0.02 | 1.48 ± 0.1   | 2.78 ± 0.02   | 3.06 ± 0.06   |
| 71                    | 1132 | 3,4-Dimethyl-2,4,6-octatriene <sub>J</sub>     | 121 | 2 | UFAO | NF                 | NF                                 | 187.64 ± 6.2a   | 16.67 ± 0.14b   | 11.21 ± 0.12c | 7.29 ± 0.05c   | 12.04 ± 1.27bc | 41.53 ± 1.38   | 11.34 ± 0.5 | 8.3 ± 0.32   | 6.45 ± 0.04   | 7.68 ± 0.07   |
| 72                    | 1037 | $\alpha$ -Ocimene <sub>J</sub>                 | 93  | 2 |      | NF                 | Fruity                             | 679.06 ± 22.5a  | 60.04 ± 7.26b   | 26.77 ± 2.07c | NF             | 27.13 ± 0.64c  | 47.65 ± 1.69   | 13.16 ± 0.7 | 15.74 ± 7.22 | 7.33 ± 0.03   | 11.26 ± 0.5   |
| 73                    | 1191 | Limonene <sub>W,J</sub>                        | 68  | 1 |      | 10-wang            | Citrus-like                        | 353.41 ± 27.2a  | 28.49 ± 1.04b   | 20.09 ± 0.85b | 10.04 ± 0.66b  | 16.8 ± 3.05b   | 35.53 ± 3.15   | 13.26 ± 0.6 | 25.63 ± 0.86 | 6.89 ± 0.14   | 8.59 ± 0.21   |
| 74                    | 1353 | Rose oxide <sub>W,J</sub>                      | 139 | 2 |      | 0.5 <sup>3,7</sup> | Rose, floral <sub>a,g</sub>        | 26.9 ± 1.25a    | 9.4 ± 0.32b     | 4.88 ± 0.08cd | 4.01 ± 0.03d   | 5.31 ± 0.3c    | 26.35 ± 0.98   | 5.37 ± 0.24 | 4.31 ± 0.28  | 4.26 ± 0.03   | 4.54 ± 0.01   |
| 75                    | 1724 | Lilac alcohol <sub>W</sub>                     |     | 2 |      | NF                 | NF                                 | NF              | 5.54 ± 0.15a    | 3.87 ± 0.2c   | 4.01 ± 0.01bc  | 4.13 ± 0.03b   | NF             | NF          | NF           | NF            | NF            |
| 76                    | 1473 | Cosmene <sub>J</sub>                           |     | 2 |      | NF                 | NF                                 | NF              | NF              | 9.01 ± 0.19a  | NF             | NF             | 30.92 ± 0.27   | NF          | NF           | 6.79 ± 0.16   | 6.54 ± 0.19   |
| 77                    |      | Geranial <sub>N</sub>                          |     | 2 |      |                    |                                    | 83.01 ± 2.27a   | 16.54 ± 1.38b   | 10.58 ± 0.24c | NF             | 8.47 ± 0.51c   | 32.94 ± 1.4    | 15.13 ± 0.9 | 14.58 ± 0.86 | 2.88 ± 0      | 16.07 ± 1.59  |
| <b><i>Ketones</i></b> |      |                                                |     |   |      |                    |                                    |                 |                 |               |                |                |                |             |              |               |               |
| 78                    | 1167 | 2,6-Dimethyl-4-heptanone <sub>W,J</sub>        | 57  | 2 | UFAO | NF                 | NF                                 | 52.15 ± 2.42a   | 8.06 ± 0.58d    | 15.45 ± 1.56c | 22.78 ± 1.73b  | 14.43 ± 0.29c  | 64.81 ± 1.08   | 29.92 ± 0.9 | 29.71 ± 1.53 | 8.34 ± 0.13   | 1NF.6         |
| 79                    | 1416 | 3-Octen-2-one <sub>J</sub>                     | 55  | 2 | UFAO | NF                 | Green, fruity <sub>b</sub>         | NF              | 7.95 ± 0.5c     | 3.16 ± 0.13cd | 31.07 ± 1.09a  | 24.49 ± 7.54b  | NF             | NF          | NF           | NF            | NF            |
| 80                    | 955  | 2,3-Butanedione <sub>W,J</sub>                 | 43  | 1 | MR   | 100 <sup>8</sup>   | Butter <sub>a</sub>                | NF              | 32.56 ± 2.15c   | 22.02 ± 0.36d | 77.8 ± 6.88a   | 61.51 ± 10.39b | 0.25 ± 0.05    | NF          | NF           | 1.41 ± 0.22   | 9.23 ± 0.51   |
| 81                    | 1337 | Sulcatone <sub>W,J</sub>                       | 43  | 1 | CR   | 50 <sup>3</sup>    | Sweet, fruity <sub>f</sub>         | 24.55 ± 0.4b    | 46.22 ± 1.46a   | 22.15 ± 0.2c  | 14.09 ± 1.86d  | 21.21 ± 0.7c   | 4.66 ± 0.14    | 0.75 ± 0.01 | 3.95 ± 4.96  | 5.15 ± 0.05   | 9.27 ± 3.99   |
| 82                    | 1596 | 6-Methyl-3,5-heptadiene-2-one <sub>B,W,J</sub> | 43  | 2 | CR   | 380 <sup>3</sup>   | Warm, spicy <sub>b</sub>           | 5.47 ± 0.44c    | 47.45 ± 1.77a   | 11.86 ± 0.61c | 12.58 ± 2.38c  | 30.45 ± 14.16b | NF             | NF          | NF           | NF            | NF            |
| 83                    | 1289 | Acetoin <sub>W,J</sub>                         | 45  | 1 |      | 800 <sup>3</sup>   | Buttery, cream <sub>a</sub>        | NF              | 265.02 ± 10.57c | 76.37 ± 8.53d | 581.23 ± 4.88a | 361.45 ± 9.94b | 90.62 ± 11.8   | NF          | NF           | 15.56 ± 0.05  | 16.71 ± 0.19  |
| 84                    | 1656 | Acetophenone <sub>B,W,J</sub>                  | 105 | 2 |      | 65 <sup>3</sup>    | Sweet, flowery <sub>a</sub>        | 26.27 ± 0.49a   | 5.66 ± 0.17c    | 3.65 ± 0.02d  | 5.15 ± 0.46c   | 8.45 ± 0.17b   | 5.61 ± 0.22    | 3.18 ± 0.06 | 5.94 ± 2.23  | 1.02 ± 0.01   | 1.62 ± 0.22   |
| <b><i>Furans</i></b>  |      |                                                |     |   |      |                    |                                    |                 |                 |               |                |                |                |             |              |               |               |
| 85                    | 1224 | 2-Pentyl furan <sub>W,J</sub>                  | 81  | 2 | UFAO | 6 <sup>3,7</sup>   | Fruity, green, sweet <sub>g</sub>  | NF              | NF              | 6.89 ± 0.45c  | 77.63 ± 1.2a   | 20.7 ± 2.06b   | NF             | NF          | NF           | NF            | NF            |

|                         |      |                                            |     |   |    |                    |                                   |               |               |               |                 |                 |               |             |             |              |             |             |
|-------------------------|------|--------------------------------------------|-----|---|----|--------------------|-----------------------------------|---------------|---------------|---------------|-----------------|-----------------|---------------|-------------|-------------|--------------|-------------|-------------|
| 86                      | 1469 | Furfural <sup>B,W,J</sup>                  | 96  | 1 | MR | 3000 <sub>3</sub>  | Sweet, almond <sup>b,c</sup>      | NF            | 58.72 ± 4.07c | 39.49 ± 7.05c | 339.24 ± 17.64a | 234.73 ± 14.13b | 4.25 ± 0.19   | 1.65 ± 0.05 | 3.27 ± 0.19 | 0.74 ± 0.02  | 1.73 ± 0.12 |             |
| 87                      | 1509 | 2-Acetyl-furan <sup>B,W,J</sup>            | 95  | 2 | MR | 1000 <sub>03</sub> | Smoky, sweet <sup>b</sup>         | NF            | NF            | 4.23 ± 0.14c  | 19.52 ± 0.56a   | 18.06 ± 1.6b    | 4.26 ± 0.06   | NF          | NF          | NF           | NF          |             |
| 88                      | 1578 | 5-Methyl-2-furfural <sup>B,W,J</sup>       | 110 | 1 | MR | NF                 | Warm, burnt, spicy <sup>b</sup>   | NF            | 3.65 ± 0.29c  | 2.69 ± 0.23c  | 9 ± 0.85b       | 13.06 ± 1.44a   | NF            | NF          | NF          | NF           | NF          |             |
| 89                      | 1270 | 5-Hydroxymethyl-2-furaldehyde <sup>J</sup> | 97  | 2 | MR | NF                 | NF                                | NF            | NF            | 14.13 ± 5.97b | 7.34 ± 0.93b    | 18.8 ± 6.68a    | NF            | NF          | NF          | NF           | NF          |             |
| <b><i>Benzenes</i></b>  |      |                                            |     |   |    |                    |                                   |               |               |               |                 |                 |               |             |             |              |             |             |
| 90                      | 1259 | Styrene <sup>J</sup>                       | 104 | 2 |    | 730 <sup>3</sup>   | Balsamic, gasoline <sup>a</sup>   | -             | 130.9 ± 5.37a | 22.31 ± 2.14b | 19.53 ± 0.4b    | 19.56 ± 0.17b   | 19.75 ± 0.21b | 0.36 ± 0.01 | 25.13 ± 0.8 | 18.34 ± 1.04 | 0.08 ± 0    | 0.11 ± 0.01 |
| 91                      | 1281 | o-Cymene <sup>J</sup>                      | 119 | 2 |    | NF                 | NF                                | 94.21 ± 3.59a | 7.68 ± 0.12b  | 7.53 ± 0.32b  | 4.44 ± 0.34bc   | 5.73 ± 0.2b     | 11.52 ± 0.47  | 5.07 ± 0.09 | 3.42 ± 1.18 | 1.73 ± 0.01  | 2.29 ± 0.05 |             |
| 92                      | 1022 | Toluene <sup>J</sup>                       | 91  | 2 |    | NF                 | Paint <sup>a</sup>                | 38.46 ± 1.4a  | 4.29 ± 0.86b  | 4.4 ± 0.25b   | 4.78 ± 0.32b    | 4.72 ± 0.18b    | 5.03 ± 0.1    | 1.71 ± 0.08 | 2.35 ± 0.16 | 3.52 ± 0.29  | 2.77 ± 0.09 |             |
| 93                      | 1757 | Naphthalene <sup>W,J</sup>                 | 128 | 1 |    | NF                 | Tar <sup>a</sup>                  | 16.47 ± 0.65a | 3.25 ± 0.12b  | 2.28 ± 0.1c   | 2.47 ± 0.03c    | 2.52 ± 0.03c    | 18.18 ± 0.7   | 3.17 ± 0.1  | 2.4 ± 0.12  | 2.86 ± 0.02  | 2.87 ± 0.03 |             |
| 94                      | 1895 | 2-Methylnaphthalene <sup>W,J</sup>         | 142 | 2 |    | NF                 | NF                                | 15.68 ± 0.54a | 3.24 ± 0.11b  | 2.47 ± 0.07c  | NF              | NF              | 18.14 ± 0.7   | 3.23 ± 0.11 | 2.54 ± 0.24 | 2.86 ± 0.03  | 2.85 ± 0.03 |             |
| <b><i>Pyrazines</i></b> |      |                                            |     |   |    |                    |                                   |               |               |               |                 |                 |               |             |             |              |             |             |
| 95                      | 1385 | 2-Ethyl-6-methylpyrazine <sup>W,J</sup>    | 121 | 1 | MR | NF                 | Nutty, grassy <sup>b</sup>        | 29.19 ± 0.97a | 1.09 ± 0.09c  | 1.65 ± 0.04c  | 4.87 ± 0.43b    | 1.58 ± 0.4c     | 3.06 ± 0.08   | 0.68 ± 0.28 | 1.19 ± 0.08 | 0.39 ± 0.01  | 0.95 ± 0.03 |             |
| 96                      | 1435 | 2,6-Diethylpyrazine <sup>W,J</sup>         | 135 | 1 | MR | 6 <sup>6</sup>     | Roasted, nutty <sup>b</sup>       | NF            | 3.56 ± 0.47b  | 1.35 ± 0.09c  | 9.76 ± 1.14a    | 2.52 ± 0.39c    | NF            | NF          | NF          | NF           | NF          |             |
| 97                      | 1462 | 5-Ethyl-2,3-dimethylpyrazine <sup>N</sup>  | 135 | 1 | MR | 3 <sup>1</sup>     | Nutty roasted, woody <sup>e</sup> | NF            | NF            | 1.57 ± 0.05bc | 7.18 ± 3.13a    | 2.56 ± 0.31b    | NF            | NF          | NF          | NF           | NF          |             |
| 98                      |      | 2,3-diethylpyrazine <sup>N</sup>           | 1   |   | MR | NF                 | NF                                | NF            | NF            | NF            | NF              | NF              | NF            | NF          | 1.23 ± 0.04 | NF           | 1.35 ± 0.05 |             |
| <b><i>Phenols</i></b>   |      |                                            |     |   |    |                    |                                   |               |               |               |                 |                 |               |             |             |              |             |             |
| 99                      | 2010 | Phenol <sup>W,J</sup>                      | 95  | 1 |    | 5900 <sub>3</sub>  | Medicinal <sup>a,d</sup>          | 5.16 ± 0.17a  | NF            | 1.06 ± 0.01c  | 1.29 ± 0.1b     | 0.85 ± 0.04d    | 2.25 ± 0.19   | 0.25 ± 0.01 | 0.63 ± 0.03 | 0.32 ± 0     | 0.64 ± 0.02 |             |
| 100                     | 2146 | 4-ethenyl-2-methoxyphenol <sup>J</sup>     | 135 | 2 |    | 3 <sup>3</sup>     | Spicy, curry <sup>a,f</sup>       | 1.81 ± 0.38a  | NF            | NF            | NF              | NF              | 4.09 ± 0.09   | 1.14 ± 0.12 | 2.48 ± 0.22 | 1.05 ± 0.01  | 1.14 ± 0.12 |             |

OTV (odor threshold values; parts per billion, µg/L) in water were reported by: (1 Ho et al., [16]; 2 Jiang & Zhang, 2010; 3 Leffingwell & Associates, [28]; 4 Nan et al., 2013; 5 Qian & Wang, [39]; 6 Wang et al., [5]; 7 Wu et al., [19]; 8 Welke et al., 2014). Aroma descriptors were obtained from “Flavornet and human odor space” (a <http://www.flavornet.org/flavornet.html>), the LRI and odor data base (b <http://www.odour.org.uk/odour/index.html>) and from the reported literature (c Jiang & Zhang, 2010; d Qian & Wang, 2005; e Wang et al., 2017; f Welke et al., 2014; g Wu et al., 2016). “NF” indicated not found. Retention indices (RI): Kovats retention indices were calculated based on a n-alkane series (C6–C24) on the poly (ethylene glycol) (PEG) column under the same chromatographic conditions. G = grapes; R = raisin. Identification method (ID-M): 1, identified, mass spectrum and RI were in accordance with standards; 2, tentatively identified, mass spectrum matched in

the standard National Institute of Standards and Technology NIST 2008 library and RI matched with the NIST Standard Reference Database (NIST Chemistry WebBook). Ion ( $m/z$ ): The characteristic ion ( $m/z$ ) was used for choosing the corresponding compound and evaluating the peak areas of them in order to avoid. B: reported in Buttery, Seifert, Ling, Soderstrom, and Yerington [22] for the study of Thompson seedless raisins. W: reported in Wang et al. [2,3] for the study of sun- and air-dried raisins in different seedless varieties. J: reported in Javed et al. [13] for the study of raisin storage. NF: never reported as volatile compounds in Thompson seedless raisins.
